# Supplementary material for: Subcritical Water Extraction of Rosmarinic Acid from Lemon Balm (Melissa officinalis L.) and Its Effect on Plant Cell Wall Constituents
Source: MDPI journal article supplement (doi:10.3390/antiox12040888), 2023-04-05
Supplement: s1 [file s1]

## Supplementary Materials

### Subcritical Water Extraction of Rosmarinic Acid from Lemon Balm (*Melissa officinalis* L.) and its Effect on Plant Cell Wall Constituents

Ana Atanasova, Ani Petrova, Desislava Teneva, Manol Ognyanov, Yordan Georgiev, Nenko Nenov, Petko Denev

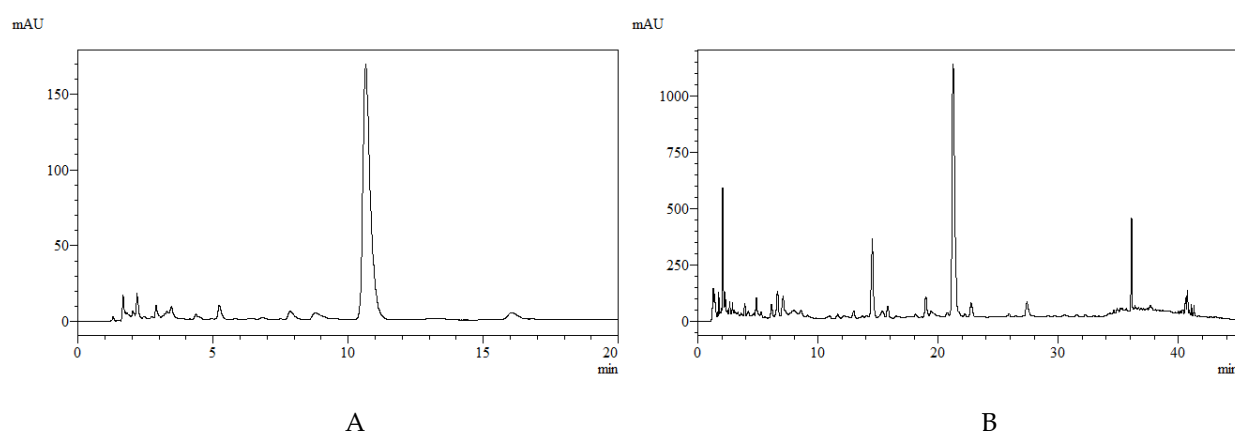

Supplementary Figure S1. Chromatograms from: A) HPLC determination of rosmarinic acid ( $\lambda = 330$  nm) in accordance to the pharmacopoeia method described in section 2.6; RT of rosmarinic acid - 10.6 min; B) HPLC determination of phenolic compounds ( $\lambda = 280$  nm) according to section 2.7.; RT: neochlorogenic acid – 2.1 min; caffeic acid - 4.8 min; rosmarinic acid – 21.2 min; luteolin – 31.3 min;

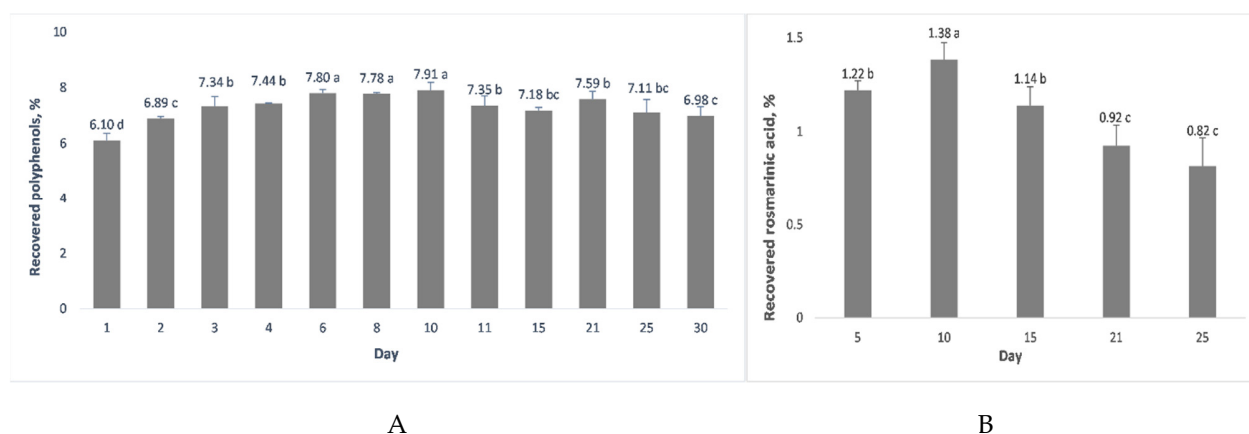

Supplementary Figure S2. Recovery of A) Total polyphenols and B) Rosmarinic acid from lemon balm dry leaves during continuous static maceration. Results are presented as mean values  $\pm$  standard deviation (SD). There are no significant differences among values marked with the same letters within individual groups.
